# Supplementary material for: Oblique direction reach test: evaluating psychometric properties in stroke population
Source: PeerJ. 2023 Dec 6;11:e16562. doi: 10.7717/peerj.16562 (PMC10710166; doi:10.7717/peerj.16562)
Supplement: Supplemental Information 1 [file peerj-11-16562-s001.xlsx]

## Sheet: Sheet1
case Serial no.	Age	Gender	Height(cm)	weight (kg)	BMI	ODRT (cm)	FRT(cm)	LRT(cm)	BBS	Type	ODRT cases	ODRT (inter)	ODRT (intra)	ODRT controls	FRT controls	LRT controls	FRT cases	LRT cases
1	64	Female	152	45	19.48	8.5	10	5.5	48	case	8.5	8.5	8.5	29	32	27	10	5.5
2	39	Male	176	70	22.6	18	20	17.5	53	case	18	18	18	24	26.5	22	20	17.5
3	75	Male	158	55	22.03	8	10	6	43	case	8	8	8	28.5	32	27	10	6
4	68	Male	161	57	21.99	21	24	16	53	case	21	21	21	29	32	27	24	16
5	45	Female	160	60	23.44	25.5	29	23.5	54	case	25.5	25.5	25.5	25	28	21	29	23.5
6	73	Female	155	48	19.98	12	14	10	49	case	12	12.5	12	20	23	18	14	10
7	69	Male	170	71	24.57	6	8.5	5	39	case	6	6	6	30	33	28	8.5	5
8	46	Female	170	79	27.34	23	25	20	56	case	23	23	23	24	26.5	22	25	20
9	41	Male	173	57	19.05	22	24	20	50	case	22	22	22	19	21	16	24	20
10	76	Male	175	60	19.59	4	5	3	39	case	4	4	4	20	23	18	5	3
11	63	Male	180	65	20.06	5.5	7	4	40	case	5.5	5	5	24	26.5	22	7	4
12	64	Male	164	50	18.59	5.5	7.5	4	44	case	5.5	5.5	5	17.5	21.5	15.5	7.5	4
13	76	Male	167	55	19.72	6	8	5	43	case	6	6	6	19.5	22	17	8	5
14	76	Female	130	36	21.3	4	6	3	39	case	4	4	4	24	26.5	22	6	3
15	71	Male	181	78	23.81	18	23	15	53	case	18	18	18	23.5	25	21.5	23	15
16	56	Male	167	63	22.59	12	15	10	49	case	12	12	12	16	19	13	15	10
17	72	Male	170	60	20.76	10	12	7	46	case	10	10	10	20	23	18	12	7
18	65	Male	170	65	22.49	12	14	9	48	case	12	12.5	12	19.5	22	17	14	9
19	53	Male	188	80	22.63	15	17	13	51	case	15	15	15	16	19	13	17	13
20	43	Female	155	57	23.73	7.5	10	5	39	case	7.5	7	7	19	21	17	10	5
21	72	Male	170	60	20.76	14	17	12	50	case	14	14	14	20.5	23	18.5	17	12
22	43	Male	160	62	24.22	15	19	10	49	case	15	15	15	29	32	27	19	10
23	61	Female	155	50	20.81	14	16	10	48	case	14	14	14	17	21	15	16	10
24	55	Female	158	60	24.03	10	12	8	46	case	10	10	10	29	32	27	12	8
25	65	Female	156	58	23.83	6.5	8.5	5	39	case	6.5	6.5	6	17.5	21.5	15.5	8.5	5
26	62	Male	170	65	22.49	6.5	9	5	39	case	6.5	6.5	6.5	21	25	19	9	5
27	45	Male	165	68	24.98	28	31	24	56	case	28	28	28	19.5	22	17	31	24
28	57	Male	176	72	23.24	5	8	4	39	case	5	6	5	17.5	21.5	15.5	8	4
29	60	Female	156	51	20.96	6	7	4	38	case	6	6	6	30	33	28	7	4
30	69	Male	165	69	25.34	14	18	12	46	case	14	14	14	17	19.5	15	18	12
31	55	Male	171	85	29.07	7	10	5	38	case	7	7	7	30.5	33	28.5	10	5
32	66	Male	160	67	26.17	17	19	14	49	case	17	17	17	20	22.5	17	19	14
33	68	Male	182	75	22.64	15.5	16	14	49	case	15.5	15.5	15.5	19.5	22	17	16	14
34	69	Male	175	91	29.71	10	12.5	9	42	case	10	10	10	29.5	33	27.5	12.5	9
35	59	Female	158	62	24.84	15	17	14	49	case	15	15	15	20	22.5	17	17	14
36	63	Female	176	59	19.05	18	20	15	50	case	18	18	18	19	21	17	20	15
37	63	Female	156	55	22.6	15	17	13	49	case	15	15	15	28.5	32	27	17	13
38	45	Female	165	68	24.98	20	24	18	50	case	20	20	20	30	33	28	24	18
39	68	Female	156	49	20.13	17.5	19	15	51	case	17.5	17.5	17.5	17	21	15	19	15
40	80	Female	150	43	19.11	14	17	10	48	case	14	14	14	20.5	23	18.5	17	10
41	39	Male	178	76	23.99	10	12	8	46	case	10	10	10	20	23	18	12	8
42	56	Female	158	60	24.03	20	22	17	50	case	20	20	20	17.5	21.5	15.5	22	17
43	65	Female	156	60	24.65	9	13	7	41	case	9	9	9	17	21	15	13	7
44	61	Male	167	72	25.82	18	20	22	49	case	18	18	18	17	21	15	20	22
45	58	Female	158	62	24.84	12	15	10	48	case	12	12	12	20	22.5	17	15	10
46	63	Male	172	72	24.34	13	17	10	48	case	13	13	13	18	21	15	17	10
47	60	Male	165	69	25.34	12	15	9	45	case	12	12	12	19.5	22	17	15	9
48	54	Male	169	75	26.26	19	23	15	50	case	19	19	19	27	31	25	23	15
49	59	Female	160	80	31.25	18	21	15	49	case	18	18	18	29.5	33	27.5	21	15
50	62	Female	155	65	27.06	10	13	7	36	case	10	10	10	17	21	15	13	7
51	53	Male	188	75	21.22	24	25	22	51	case	24	24	24	29	33	27.5	25	22
52	60	Male	167	69	24.74	18	21	14	50	case	18	18	18	20	23	18	21	14
53	75	Male	170	78	26.99	7	10	5	34	case	7	7	7	25	28	21	10	5
54	60	Male	170	85	29.41	8	10	7	36	case	8	8	8	17	19.5	15	10	7
55	76	Female	155	60	24.97	13	15	10	48	case	13	13	13	20	23	18	15	10
56	80	Female	149	42	18.92	11	13	8	47	case	11	11	11	29	33	27.5	13	8
57	72	Female	160	50	19.53	8	10	6	35	case	8	8	8	24	26.5	22	10	6
58	55	Female	158	60	24.03	17	20	15	49	case	17	17	17	20	23	18	20	15
59	66	Female	156	56	23.01	10	13	7	36	case	10	10	10	19.5	22	17	13	7
60	70	Female	165	65	23.88	5	11	2	37	case	5	5	5	25	28	23	11	2
61	55	Male	170	65	22.49	12	17	10	49	case	12	12	12	19.5	22	17	17	10
62	80	Male	160	81	31.64	11	14	8	47	case	11	11	11	19.5	22	17	14	8
63	74	Male	170	60	20.76	9	11	5	40	case	9	9	9	19.5	22	17	11	5
64	75	Female	152	48	20.78	5	6	4	35	case	5	5	5	21	23	18	6	4
65	62	Male	176	69	22.28	3	4	1	33	case	3	3	3	20	23	18	4	1
66	68	Female	156	50	20.55	5	7	3	39	case	5	5	5	20	23	18	7	3
67	56	Male	167	63	22.59	7	10	5	39	case	7	7	7	29.5	33	27.5	10	5
68	47	Male	164	62	23.05	6	7	5	43	case	6	6	5	19.5	22	17	7	5
69	57	Male	164.5	69	25.5	20	19	17.5	51	case	20	19	20	16	19	13	19	17.5
70	48	Male	185	69	20.16	13	15	12	49	case	13	13.5	12	30	33	28	15	12
71	48	Male	163	63	23.71	5.5	8	3	44	case	5.5	5.5	5.5	25	28	22.5	8	3
72	55	Female	158	60	24.03	10	15	14	49	case	10	13	13	20	23	18	15	14
73	62	Male	176	69	22.28	6	9	4	38	case	6	6	6	20.5	23	18.5	9	4
74	42	Female	156	56	23.01	18	20	17	54	case	18	18	18	20.5	23.5	18.5	20	17
75	58	Female	158	62	24.84	10	15	8	49	case	10	10	9	20	23	18	15	8
76	69	Male	176	70	22.6	5.5	6	6	45	case	5.5	5.5	6.5	20.5	23.5	18.5	6	6
77	60	Male	165	69	25.34	8.5	14	9.5	48	case	8.5	8.5	8.5	26.5	28	25	14	9.5
78	58	Male	158	60	24.03	12.5	12.5	9	49	case	12.5	12.5	12.5	21	23	18	12.5	9
79	76	Female	140	55	28.06	15.5	15	14.5	49	case	15.5	15	14.5	20	23	18	15	14.5
80	69	Female	166.5	65	23.45	16.5	18.5	14	49	case	16.5	16	16.5	27	31	25	18.5	14
81	57	Male	176	72	23.24	17.5	18.5	18	50	case	17.5	17	17	20	23	18	18.5	18
82	59	Male	160.5	62	24.07	14.5	16.5	14.5	49	case	14.5	14	13	17.5	21.5	15.5	16.5	14.5
83	80	Male	161	62	23.92	7	6	5.5	40	case	7	7	6.5	20	23	18	6	5.5
84	64	Male	180	74	22.84	14.4	16.5	15	49	case	14.4	15	14.5	17	21	15	16.5	15
85	68	Female	158	52	20.83	19.5	22.5	21.5	54	case	19.5	20	19	16	19	13	22.5	21.5
86	80	Male	160	80	31.25	8	10	9.5	40	case	8	8.5	8	17.5	21.5	15.5	10	9.5
87	68	Female	156	49	20.13	12.5	17.5	10	49	case	12.5	12.5	12.5	26.5	28	25	17.5	10
88	61	Male	161	60	23.15	13	14.5	11.5	49	case	13	13	13	19.5	22	17	14.5	11.5
89	50	Male	160	62	24.22	16.5	20	18.5	50	case	16.5	16.5	16.5	17.5	21.5	15.5	20	18.5
90	71	Male	165	65	23.88	14	17	11	49	case	14	14	14	26.5	28	25	17	11
91	51	Male	159	60	23.73	21	25	19	54	case	21	21	20	16	19	13	25	19
92	75	Female	152	55	23.81	17	20	15	50	case	17	17	17	17.5	21.5	15.5	20	15
93	59	Male	167	72	25.82	11.5	12	9	45	case	11.5	11	10	17.5	21.5	15.5	12	9
94	68	Male	182	75	22.64	13.5	16.5	10	46	case	13.5	13	13	20	23	18	16.5	10
95	75	Female	152	48	20.78	14	15	10	49	case	14	14	14	19.5	22	17	15	10
96	35	Male	179	59	18.41	13	15	10	49	case	13	13	13	25	28	23	15	10
1	47	Male	164	62	23.05	29	32	27		control
2	57	Male	164.5	69	25.5	24	26.5	22		control
3	48	Male	185	69	20.16	28.5	32	27		control
4	48	Male	163	63	23.71	29	32	27		control
5	55	Female	158	60	24.03	25	28	21		control
6	62	Male	176	69	22.28	20	23	18		control
7	42	Female	156	56	23.01	30	33	28		control
8	58	Female	158	62	24.84	24	26.5	22		control
9	69	Male	176	70	22.6	19	21	16		control
10	60	Male	165	69	25.34	20	23	18		control
11	58	Male	158	60	24.03	24	26.5	22		control
12	76	Female	140	55	28.06	17.5	21.5	15.5		control
13	69	Female	166.5	65	23.45	19.5	22	17		control
14	57	Male	176	72	23.24	24	26.5	22		control
15	59	Male	160.5	62	24.07	23.5	25	21.5		control
16	80	Male	161	62	23.92	16	19	13		control
17	64	Male	180	74	22.84	20	23	18		control
18	68	Female	158	52	20.83	19.5	22	17		control
19	80	Male	160	80	31.25	16	19	13		control
20	68	Female	156	49	20.13	19	21	17		control
21	61	Male	161	60	23.15	20.5	23	18.5		control
22	50	Male	160	62	24.22	29	32	27		control
23	71	Male	165	65	23.88	17	21	15		control
24	51	Male	159	60	23.73	29	32	27		control
25	75	Female	152	55	23.81	17.5	21.5	15.5		control
26	59	Male	167	72	25.82	21	25	19		control
27	68	Male	182	75	22.64	19.5	22	17		control
28	75	Female	152	48	20.78	17.5	21.5	15.5		control
29	35	Male	179	59	18.41	30	33	28		control
30	64	Female	152	45	19.48	17	19.5	15		control
31	39	Male	176	70	22.6	30.5	33	28.5		control
32	75	Male	158	55	22.03	20	22.5	17		control
33	68	Male	161	57	21.99	19.5	22	17		control
34	45	Female	160	60	23.44	29.5	33	27.5		control
35	73	Female	155	48	19.98	20	22.5	17		control
36	69	Male	170	71	24.57	19	21	17		control
37	46	Female	170	79	27.34	28.5	32	27		control
38	41	Male	173	57	19.05	30	33	28		control
39	76	Male	175	60	19.59	17	21	15		control
40	63	Male	180	65	20.06	20.5	23	18.5		control
41	64	Male	164	50	18.59	20	23	18		control
42	76	Male	167	55	19.72	17.5	21.5	15.5		control
43	76	Female	130	36	21.3	17	21	15		control
44	71	Male	181	78	23.81	17	21	15		control
45	56	Male	167	63	22.59	20	22.5	17		control
46	72	Male	170	60	20.76	18	21	15		control
47	65	Male	170	65	22.49	19.5	22	17		control
48	53	Male	188	80	22.63	27	31	25		control
49	43	Female	155	57	23.73	29.5	33	27.5		control
50	72	Male	170	60	20.76	17	21	15		control
51	43	Male	160	62	24.22	29	33	27.5		control
52	61	Female	155	50	20.81	20	23	18		control
53	55	Female	158	60	24.03	25	28	21		control
54	65	Female	156	58	23.83	17	19.5	15		control
55	62	Male	170	65	22.49	20	23	18		control
56	45	Male	165	68	24.98	29	33	27.5		control
57	57	Male	176	72	23.24	24	26.5	22		control
58	60	Female	156	51	20.96	20	23	18		control
59	69	Male	165	69	25.34	19.5	22	17		control
60	55	Male	171	85	29.07	25	28	23		control
61	66	Male	160	67	26.17	19.5	22	17		control
62	68	Male	182	75	22.64	19.5	22	17		control
63	69	Male	175	91	29.71	19.5	22	17		control
64	59	Female	158	62	24.84	21	23	18		control
65	63	Female	176	59	19.05	20	23	18		control
66	63	Female	156	55	22.6	20	23	18		control
67	45	Female	165	68	24.98	29.5	33	27.5		control
68	68	Female	156	49	20.13	19.5	22	17		control
69	80	Female	150	43	19.11	16	19	13		control
70	39	Male	178	76	23.99	30	33	28		control
71	56	Female	158	60	24.03	25	28	22.5		control
72	65	Female	156	60	24.65	20	23	18		control
73	61	Male	167	72	25.82	20.5	23	18.5		control
74	58	Female	158	62	24.84	20.5	23.5	18.5		control
75	63	Male	172	72	24.34	20	23	18		control
76	60	Male	165	69	25.34	20.5	23.5	18.5		control
77	54	Male	169	75	26.26	26.5	28	25		control
78	59	Female	160	80	31.25	21	23	18		control
79	62	Female	155	65	27.06	20	23	18		control
80	53	Male	188	75	21.22	27	31	25		control
81	60	Male	167	69	24.74	20	23	18		control
82	75	Male	170	78	26.99	17.5	21.5	15.5		control
83	60	Male	170	85	29.41	20	23	18		control
84	76	Female	155	60	24.97	17	21	15		control
85	80	Female	149	42	18.92	16	19	13		control
86	72	Female	160	50	19.53	17.5	21.5	15.5		control
87	55	Female	158	60	24.03	26.5	28	25		control
88	66	Female	156	56	23.01	19.5	22	17		control
89	70	Female	165	65	23.88	17.5	21.5	15.5		control
90	55	Male	170	65	22.49	26.5	28	25		control
91	80	Male	160	81	31.64	16	19	13		control
92	74	Male	170	60	20.76	17.5	21.5	15.5		control
93	75	Female	152	48	20.78	17.5	21.5	15.5		control
94	62	Male	176	69	22.28	20	23	18		control
95	68	Female	156	50	20.55	19.5	22	17		control
96	56	Male	167	63	22.59	25	28	23		control
